# Supplementary figures and images for: Sustainable production of pyruvic acid: oxidative dehydrogenation of lactic acid over the FeMoO/P catalyst
Source: Royal Society of Chemistry journal article supplement (doi:10.1039/d0nj00118j), 2020-01-01

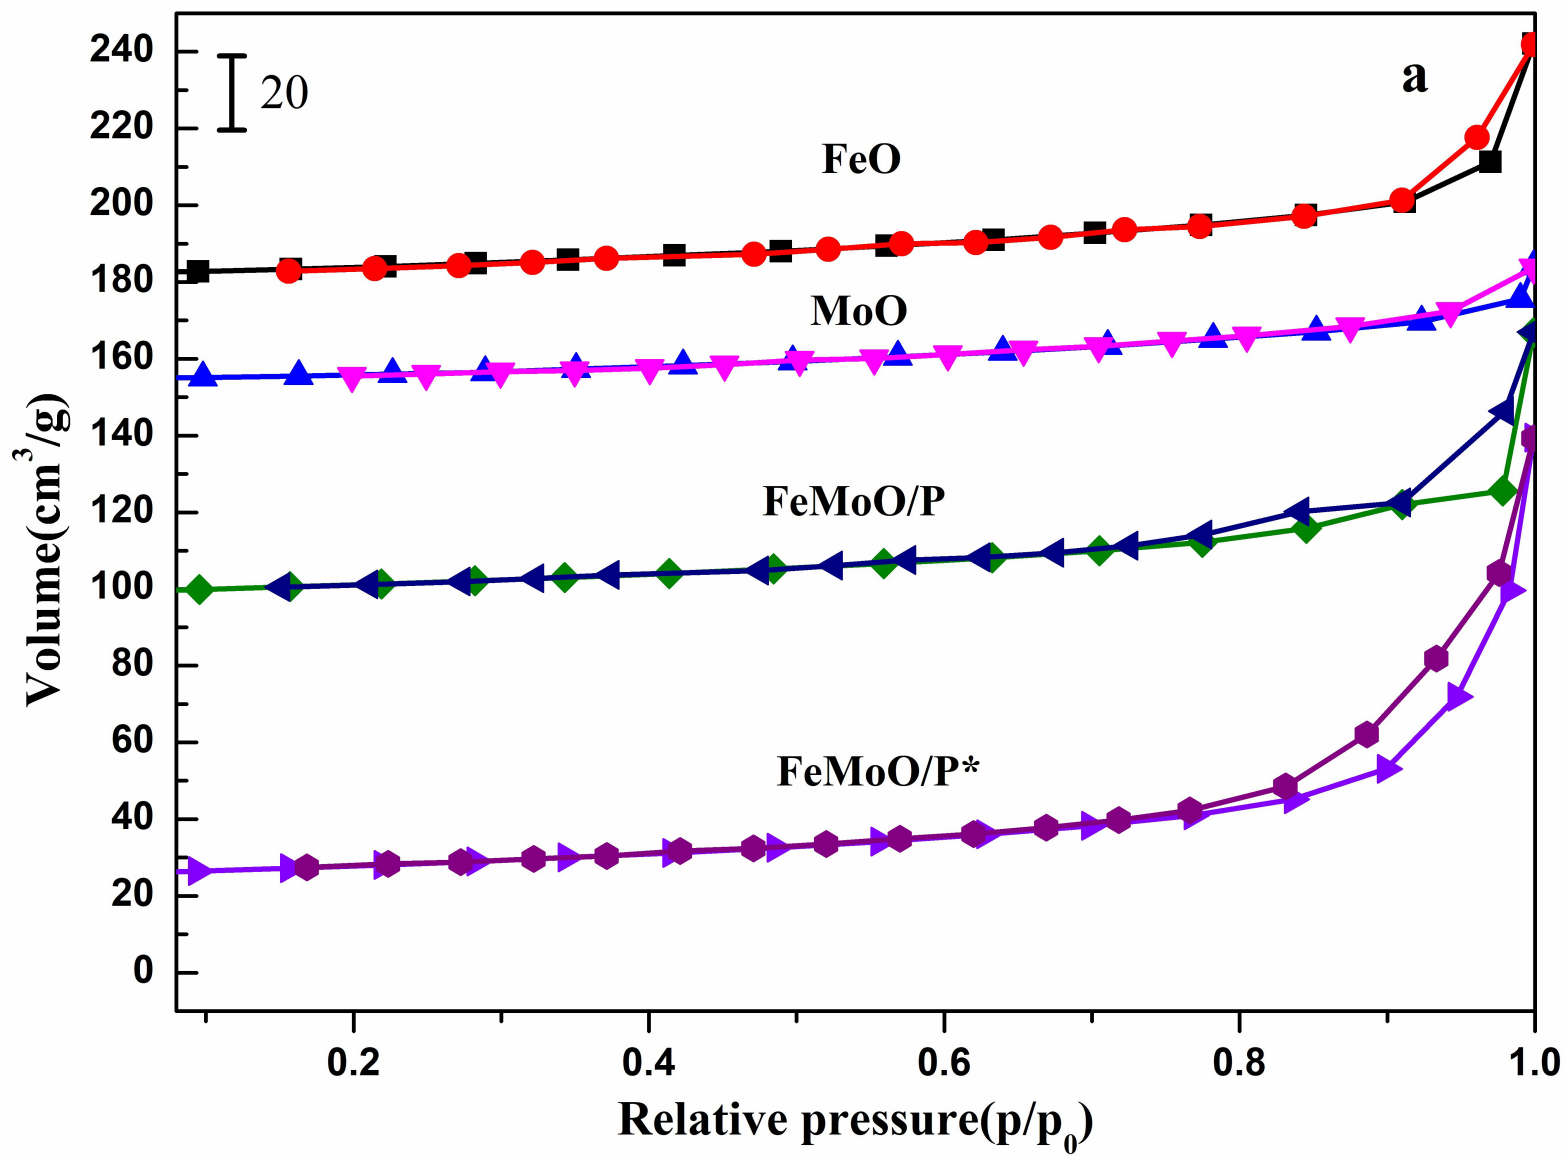

Supplement: d0nj00118j1.pdf [file d0nj00118j1.pdf]

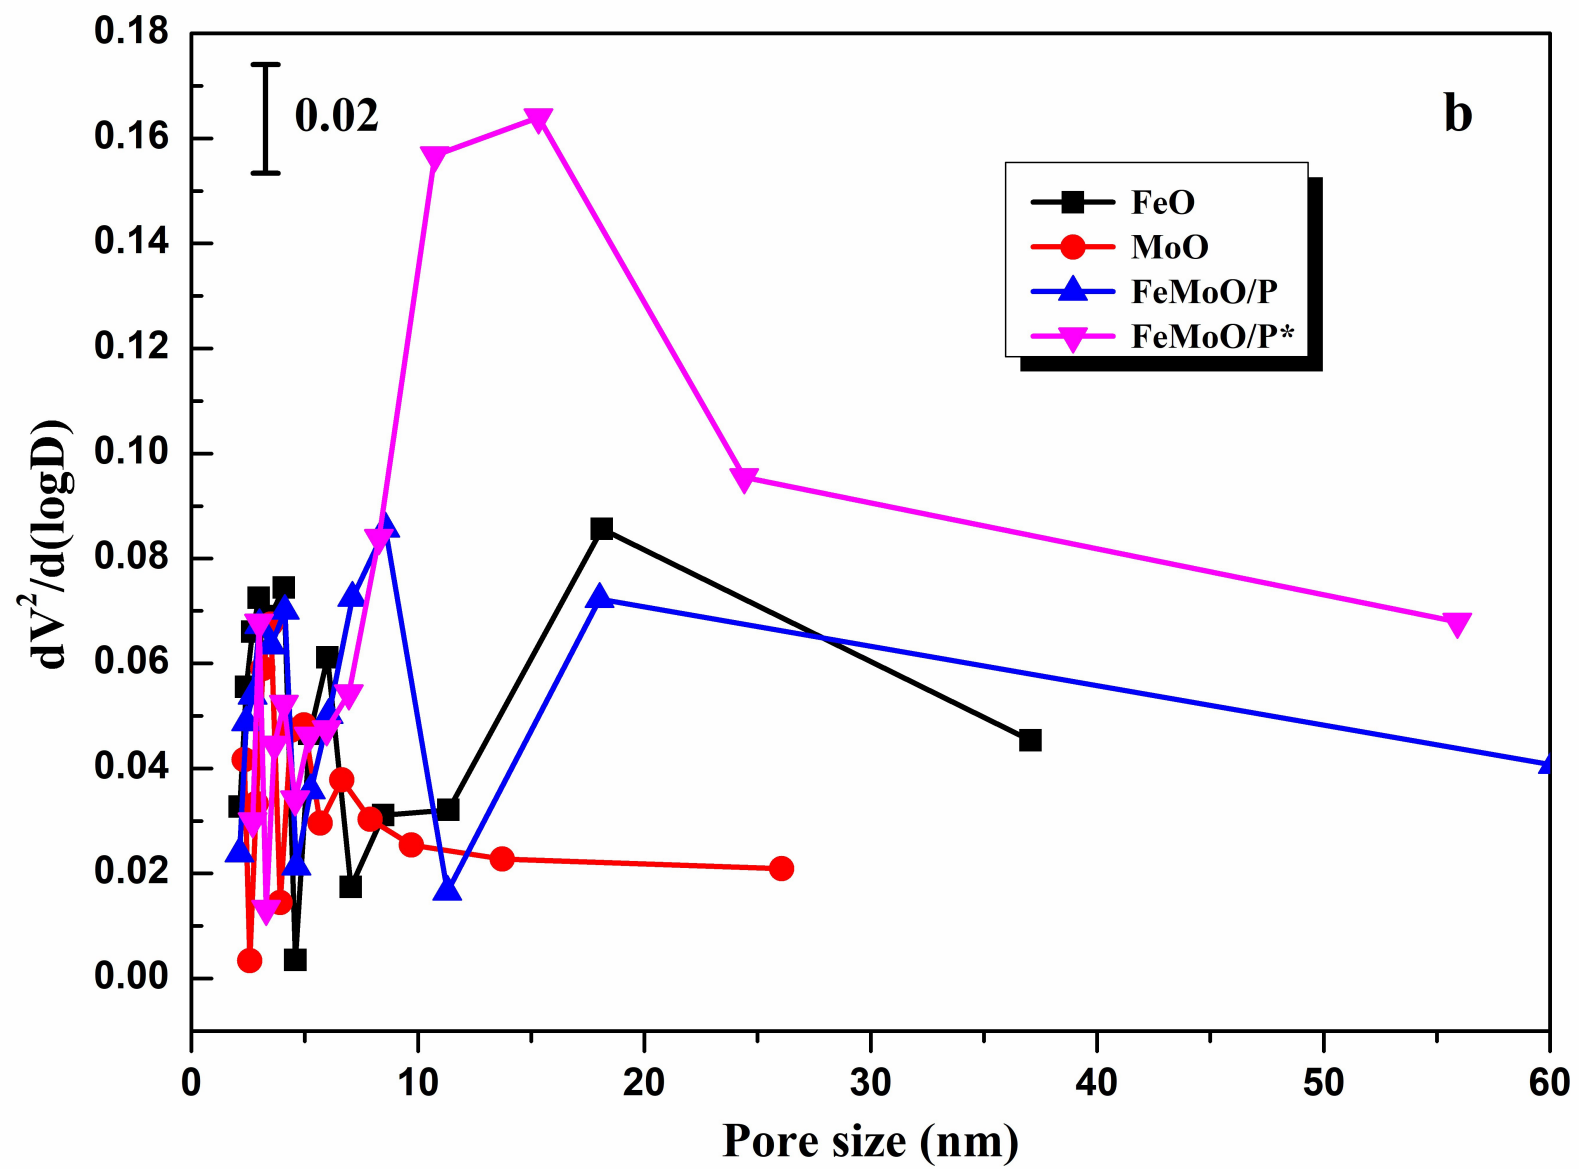

Supplement: d0nj00118j2.pdf [file d0nj00118j2.pdf]

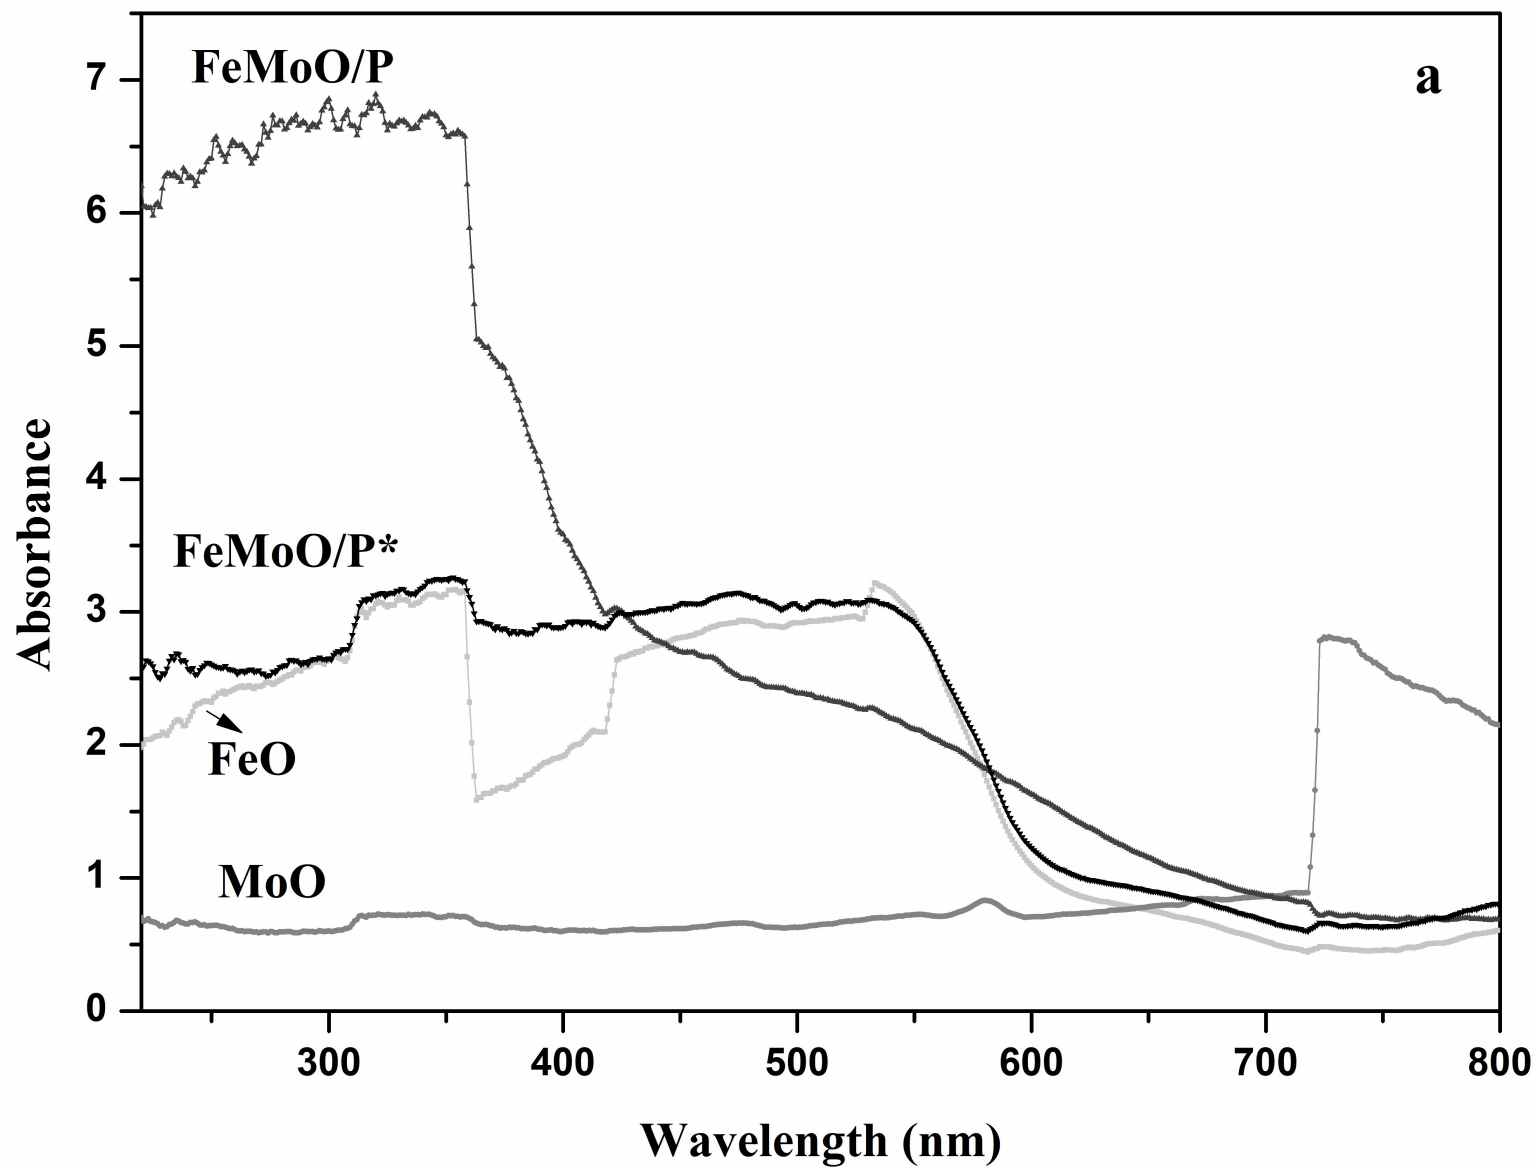

Supplement: d0nj00118j3.pdf [file d0nj00118j3.pdf]

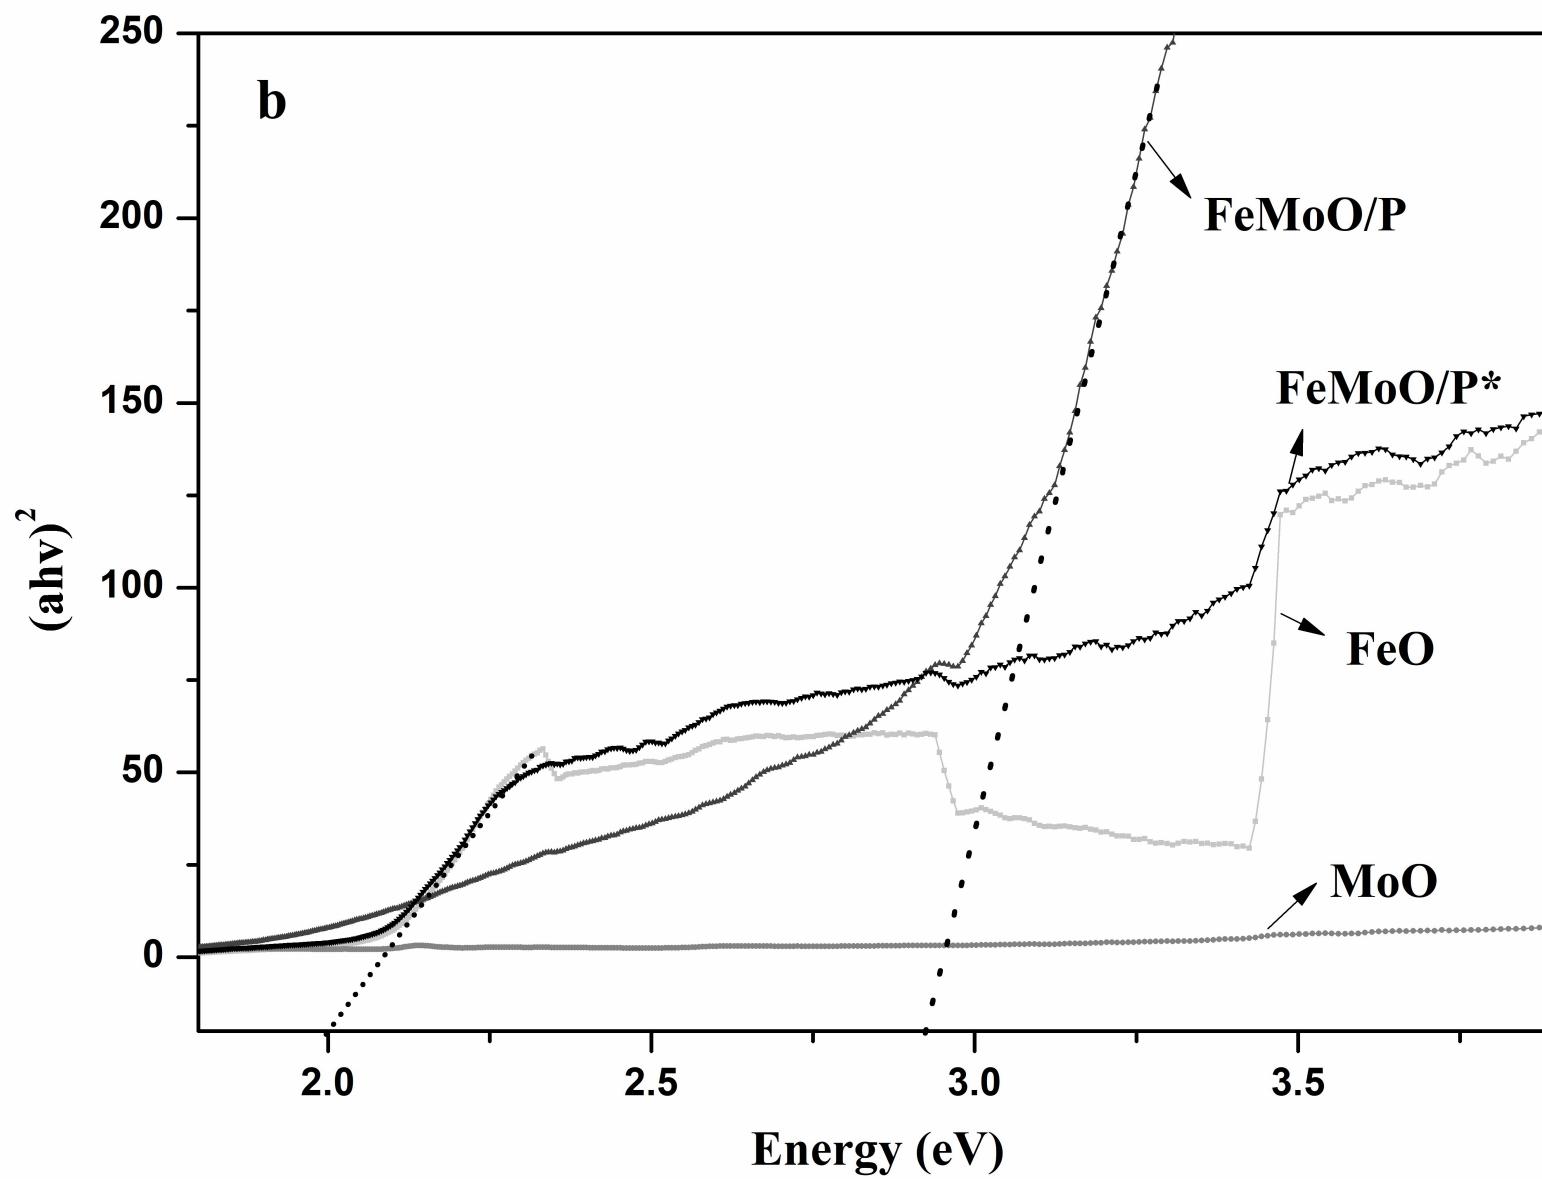

Supplement: d0nj00118j4.pdf [file d0nj00118j4.pdf]

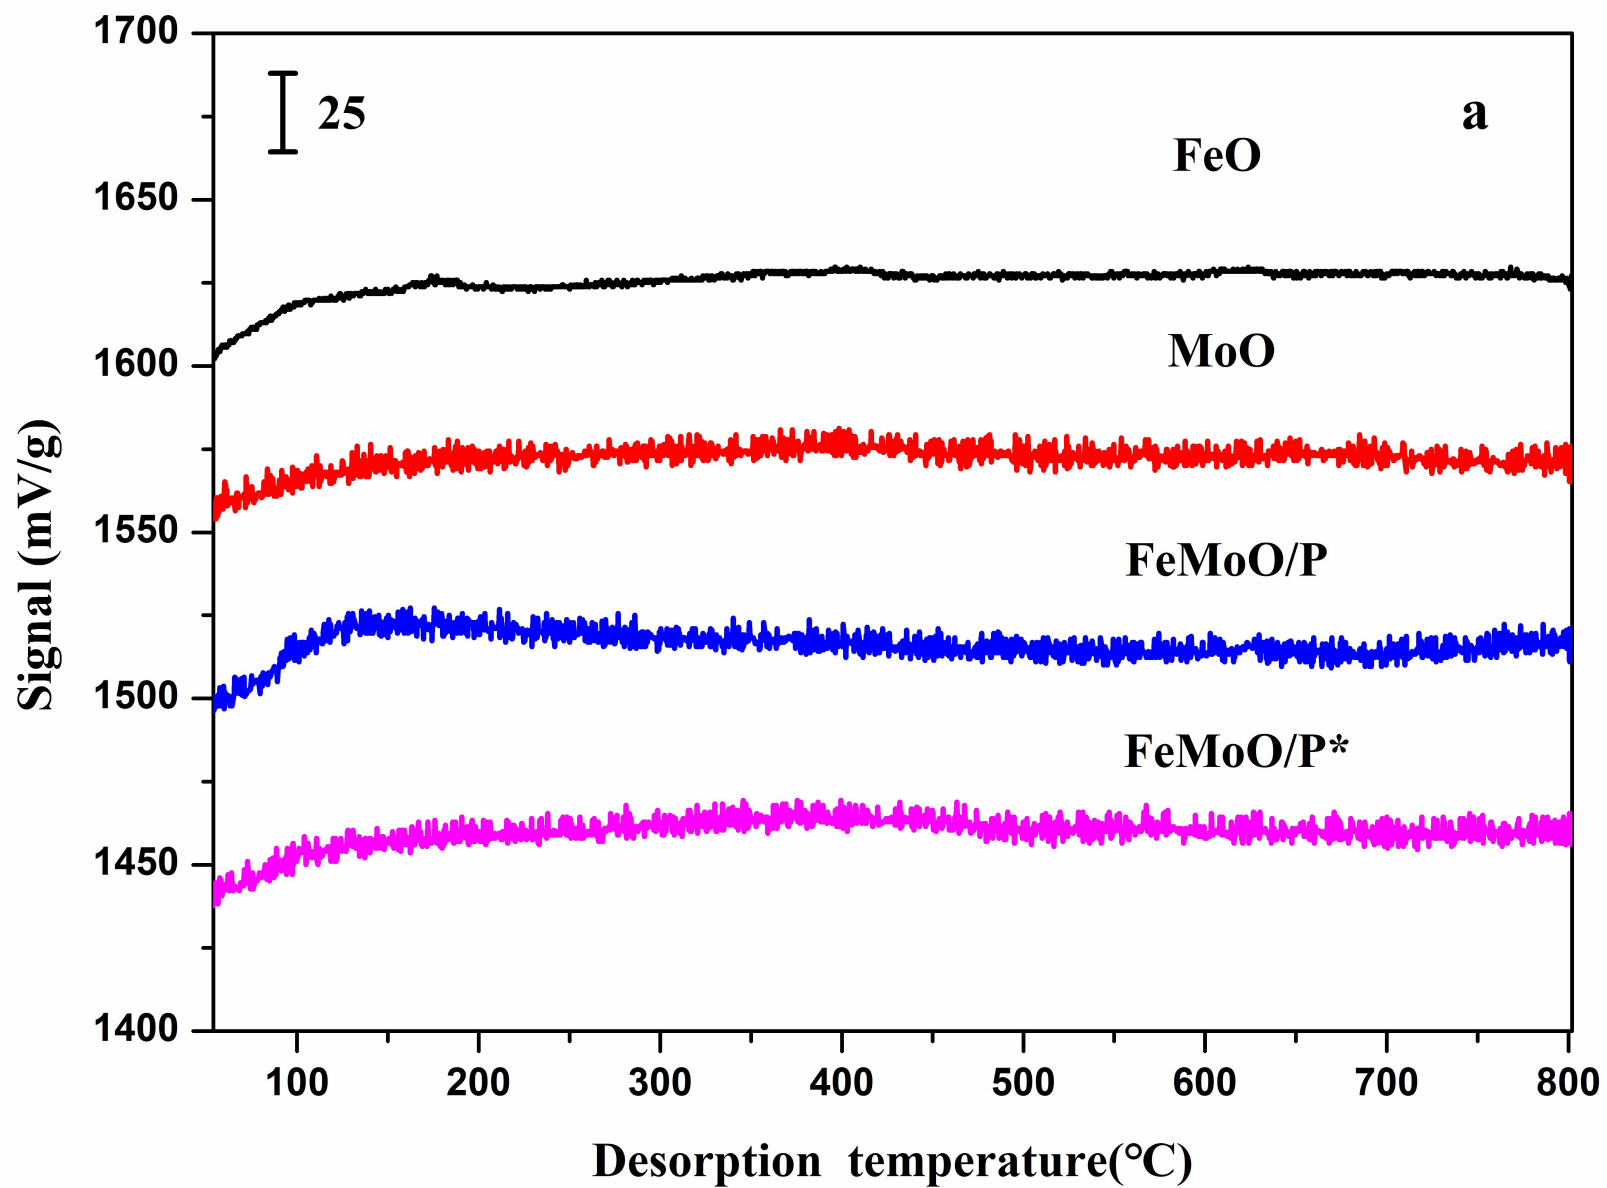

Supplement: d0nj00118j5.pdf [file d0nj00118j5.pdf]

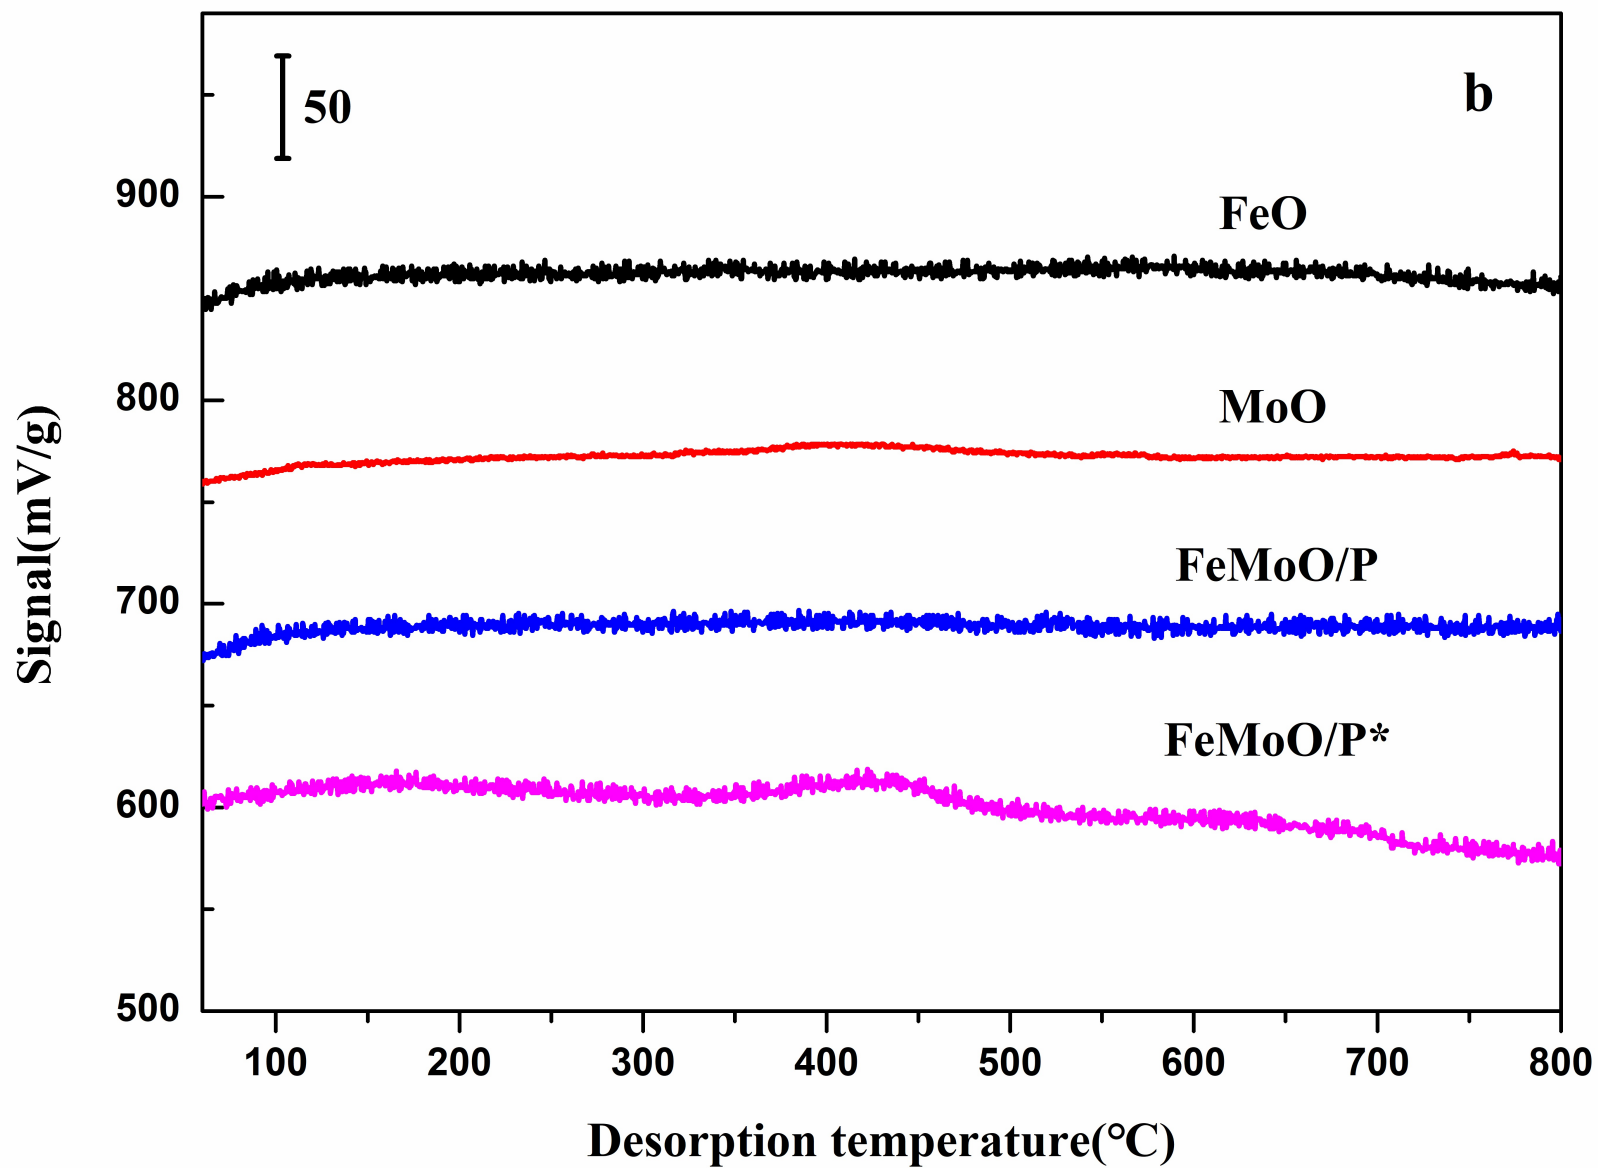

Supplement: d0nj00118j6.pdf [file d0nj00118j6.pdf]

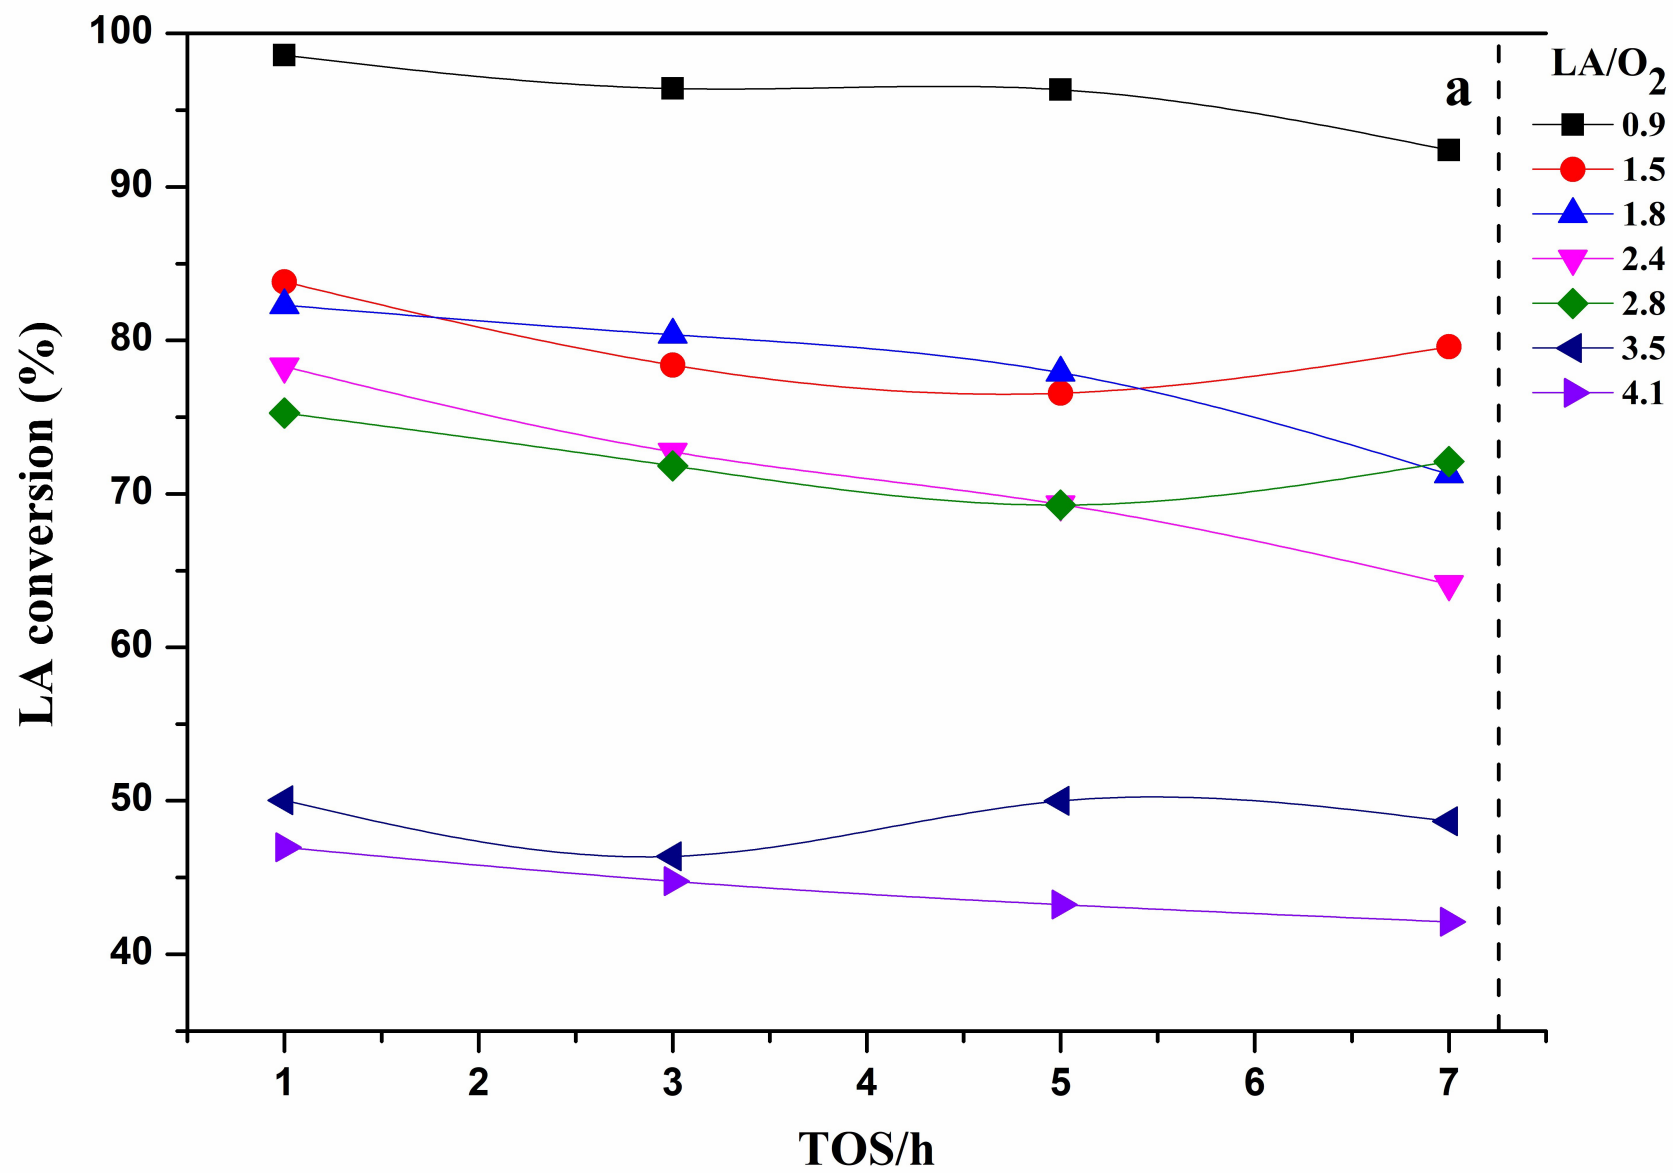

Supplement: d0nj00118j7.pdf [file d0nj00118j7.pdf]

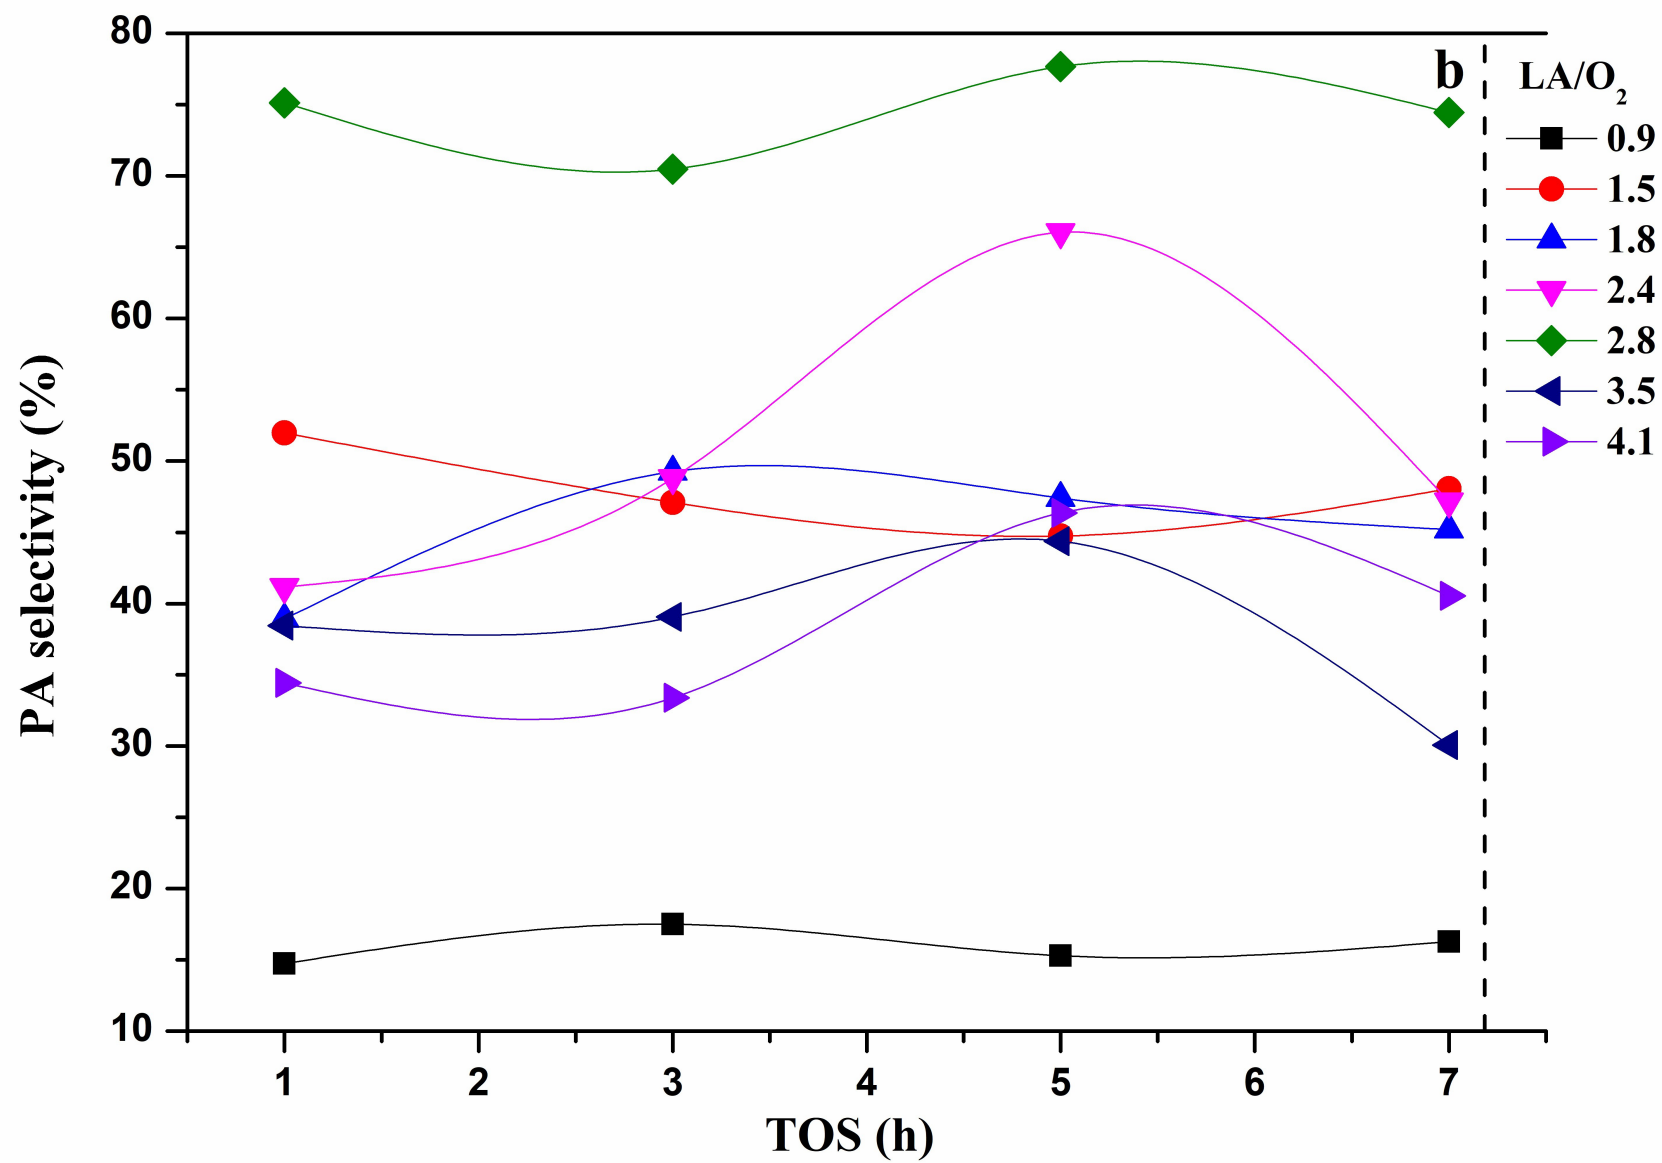

Supplement: d0nj00118j8.pdf [file d0nj00118j8.pdf]
